# Supplementary material
Source: publisher site journal article supplement (https://www.dovepress.com/article/409869)
Supplement: Supplementary file 1 [file get_supplementary_file.php]

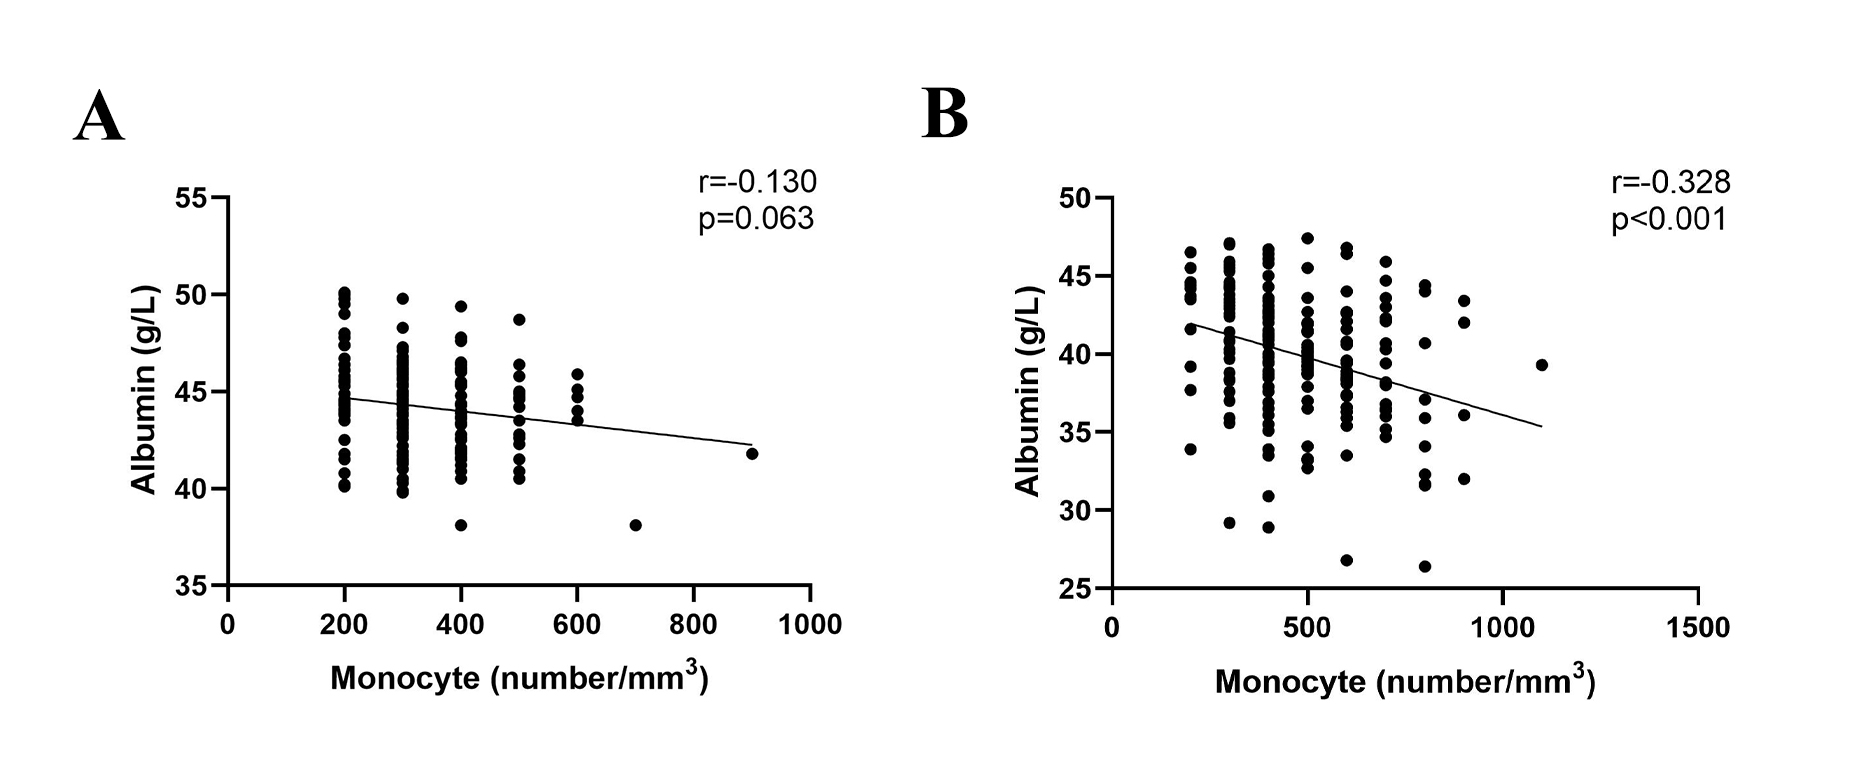


Figure S1: Correlation analysis between monocytes and albumin. (A) healthy controls and (B) NSCLC patients.

Note: *P* value was calculated by the Spearman correlation analysis. The r value indicates the degree of correlation between the two related indicators.


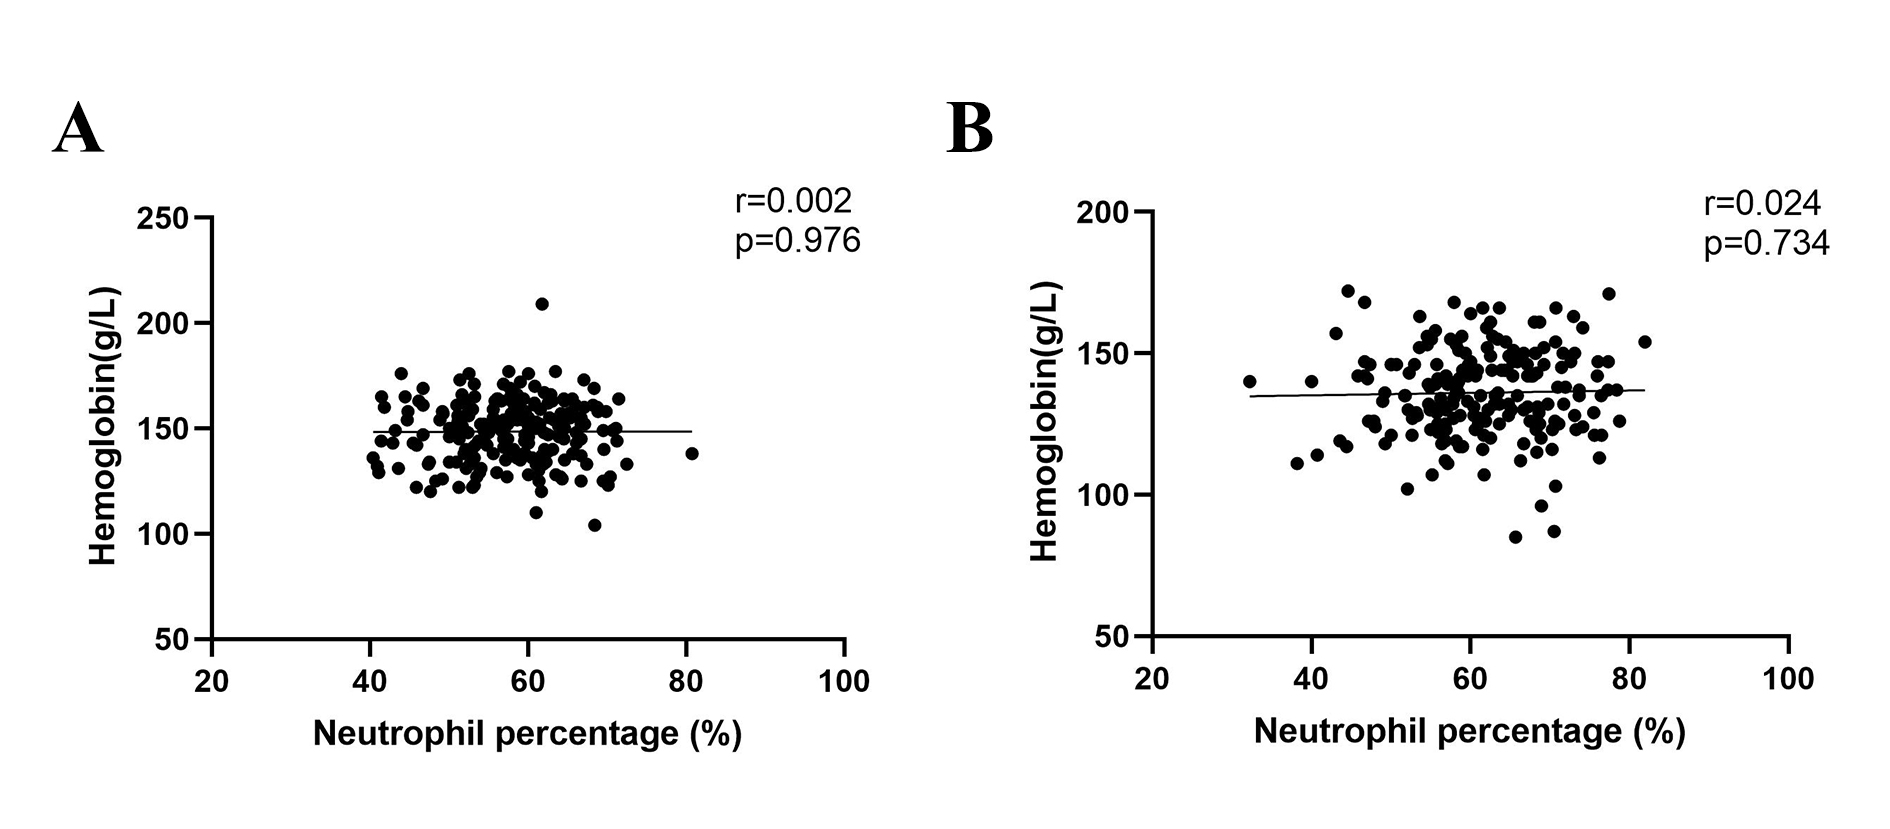


Figure S2: Correlation analysis between neutrophil percentage and hemoglobin. (A) healthy controls and (B) NSCLC patients.

Note: *P* value was calculated by the Pearson correlation analysis. The r value indicates the degree of correlation between the two related indicators.
